# Supplementary material for: The Mediterranean Mussel Mytilus galloprovincialis (Mollusca: Bivalvia) in Chile: Distribution and Genetic Structure of a Recently Introduced Invasive Marine Species
Source: MDPI journal article supplement (doi:10.3390/ani14060823), 2024-03-07
Supplement: s1 [file s1]

## Supporting information

**Table S1.** Sites where *Mytilus* spp. are absent on the Chilean coast.

| Site           | Inspection date | Coordinates                   |
|----------------|-----------------|-------------------------------|
| Tongoy         | 07.02.2016      | 30°15'22.33''S;71°30'10.85''W |
| Pelluhue       | 26.01.2016      | 35°48'48.36''S;72°34'40.82''W |
| Curanipe       | 26.01.2016      | 35°50'32.52''S;72°38'14.54''W |
| Pullay         | 26.01.2016      | 36°01'06.93''S;72°46'44.65''W |
| Buchupureo     | 26.01.2016      | 36°04'38.23''S;72°47'23.63''W |
| Cobquecura     | 26.01.2016      | 36°08'05.73''S;72°47'40.15''W |
| Caleta Taucu   | 26.01.2016      | 36°10'53.75''S;72°48'57.79''W |
| Colmuyao       | 25.01.2016      | 36°11'44.18''S;72°49'24.31''W |
| Purema         | 25.01.2016      | 36°26'42.28''S;72°52'55.67''W |
| Merquiche      | 25.01.2016      | 36°29'07.94''S;72°54'23.66''W |
| Puda           | 25.01.2016      | 36°30'00.06''S;72°54'29.81''W |
| Isla Mocha     | 14.03.2016      | 38°23'32.32''S;73°54'34.21''W |
| Chivilingo     | 17.04.2016      | 37°08'37.66''S;73°01'17.60''W |
| Laraquete      | 17.04.2016      | 37°10'27.43''S;73°11'57.84''W |
| Caleta Ránquil | 05.12.2015      | 37°31'00.00''S;73°37'00.00''W |
| Tirúa          | 05.12.2015      | 38°20'28.68''S;73°30'07.17''W |

**Table S2.** GenBank accession numbers and sample site information of sequence data used for this study for cytochrome *c* oxidase subunit I (COI).

| Sample location               | GenBank Accession | <i>N</i> | Reference                      |
|-------------------------------|-------------------|----------|--------------------------------|
| Samos, Greece                 | AY130054 to       | 7        | Riginos et al. (2004)<br>[119] |
|                               | AY130060          |          |                                |
|                               | AM905220 to       | 6        |                                |
| Chioggia, Italy               | AM905225          |          | [39]                           |
| Paternoster Bay, South Africa | AM905216 to       | 4        | [39]                           |
|                               | AM905219          |          |                                |
|                               | DQ351477 to       | 20       |                                |
| South Africa                  | DQ351497          |          | [120]                          |

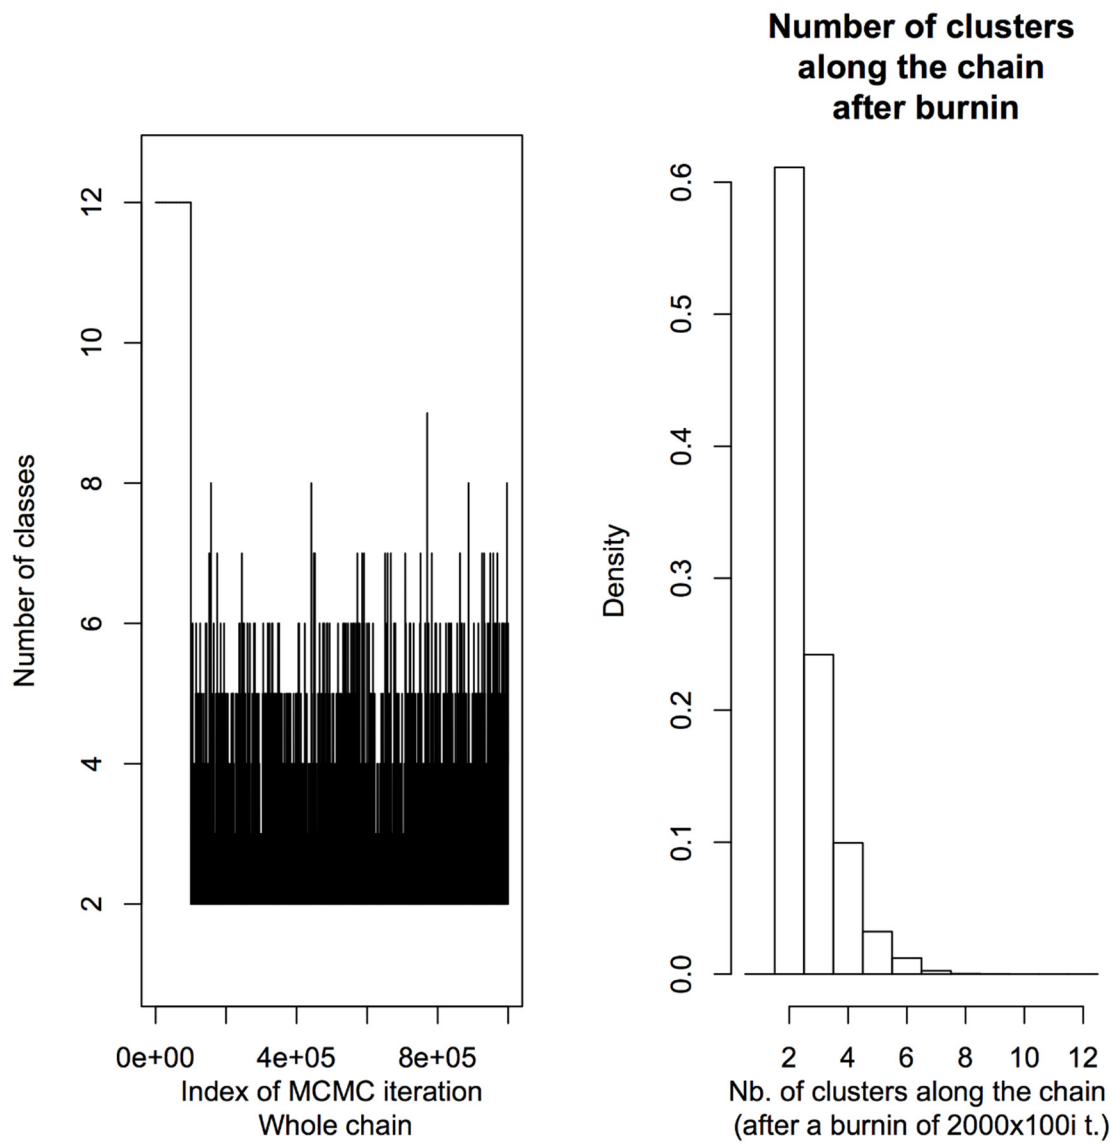

**Figure S1.** Plot of the number of clusters ( $K$ ) simulated from the posterior distribution obtained with Geneland for the analysis of Chilean mussel genetic diversity.

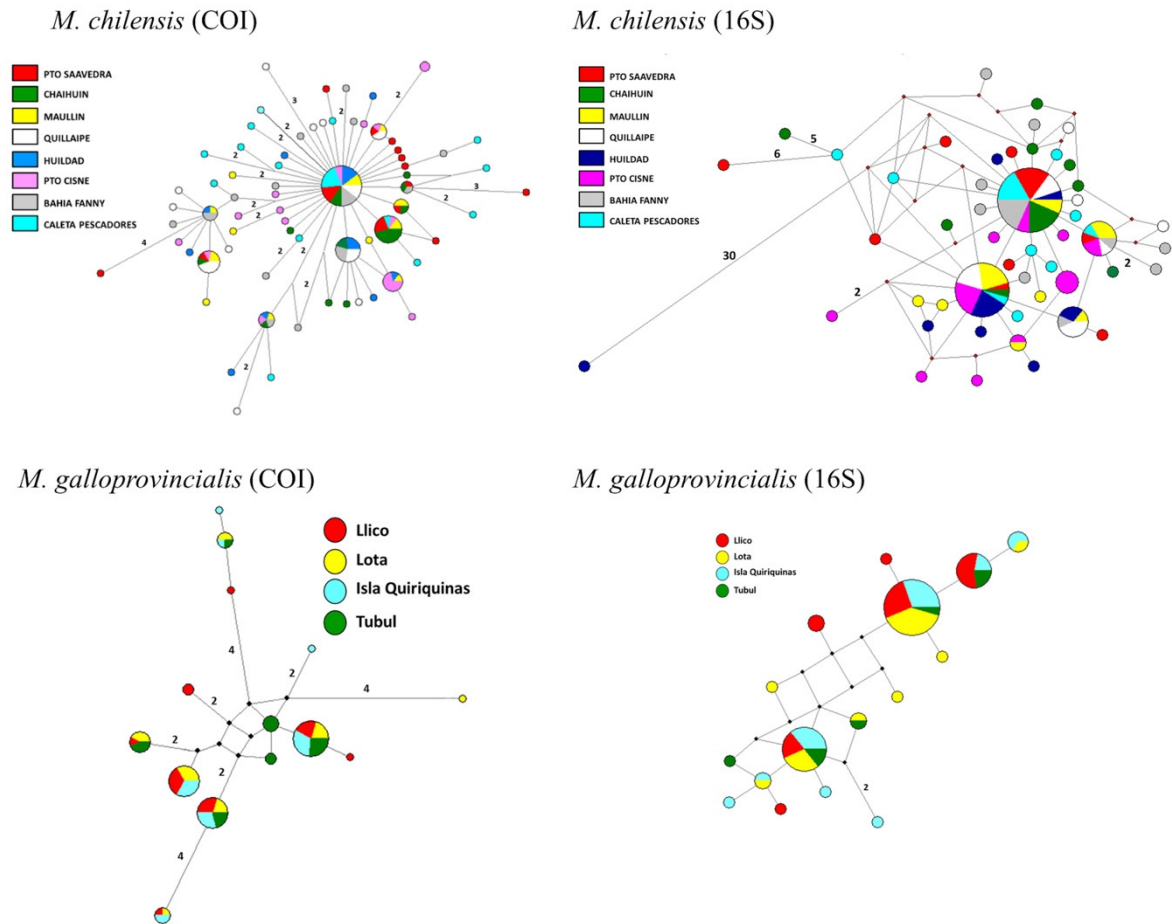

**Figure S2.** mtDNA (COI and 16S) Maximum Parsimony network analyses including sequences of *Mytilus galloprovincialis* and *M. chilensis* from different localities in Chile. Each haplotype is represented by a coloured circle indicating the main location where it was collected. Circle sizes are proportional to haplotype frequencies. The numbers represent the minimum number of mutational steps between haplotypes.

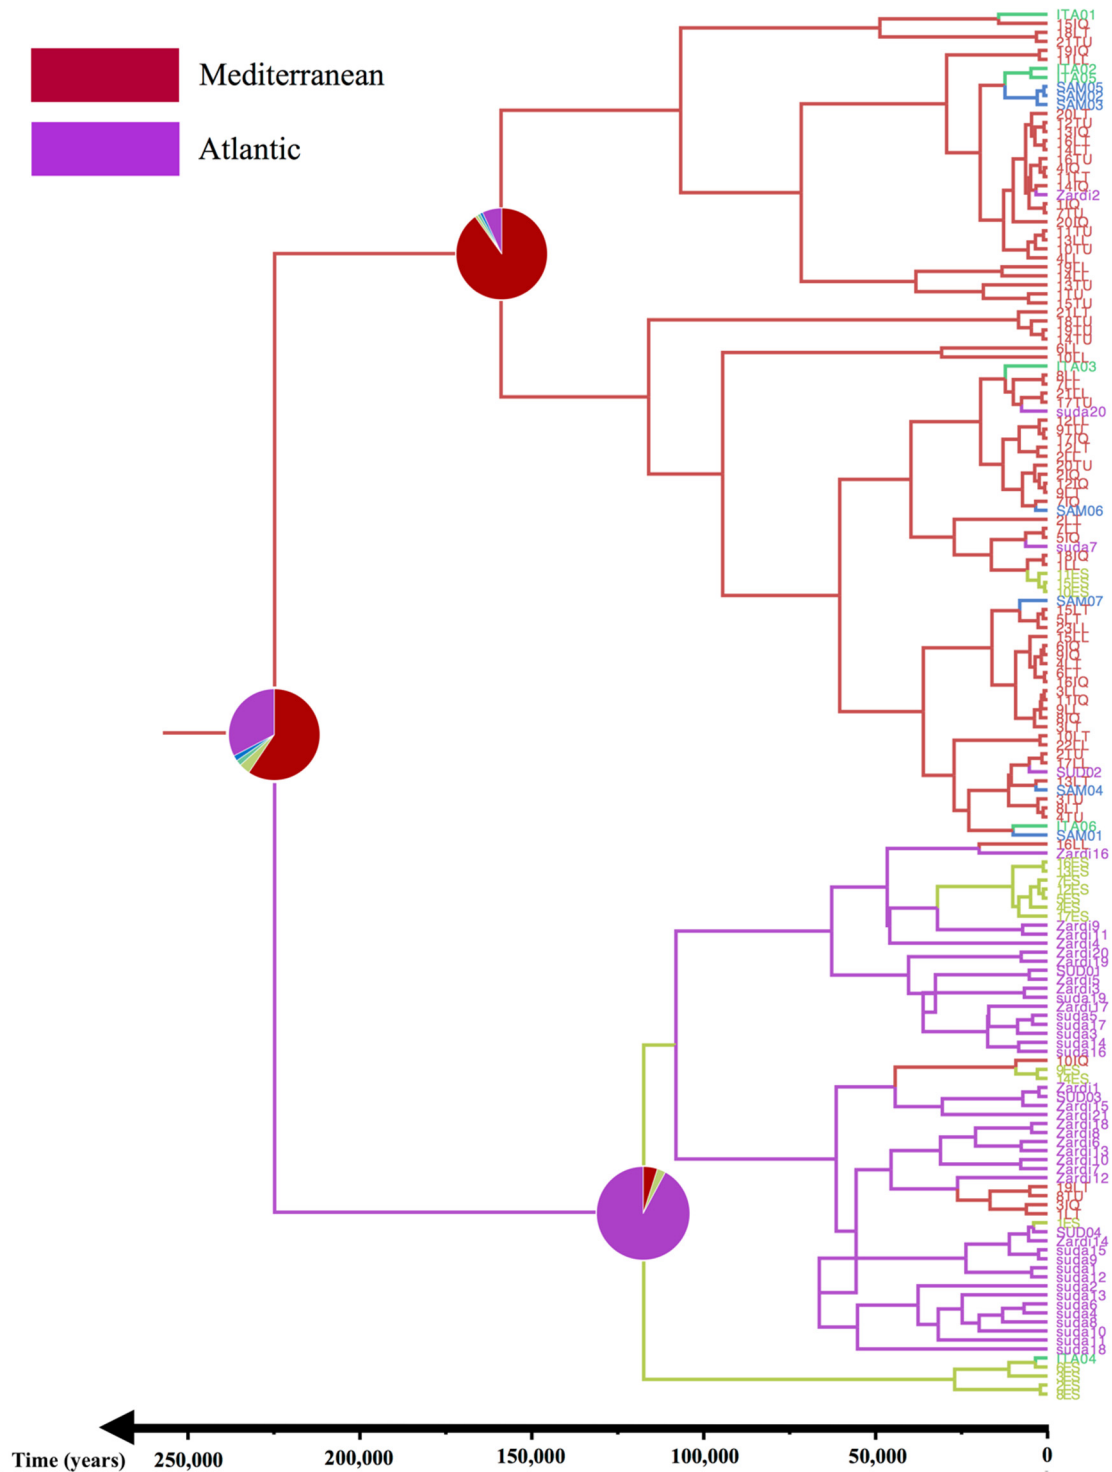

**Figure S3.** Maximum clade credibility tree from the Bayesian analyses based on Cytochrome Oxidase subunit I (COI) sequences for *Mytilus galloprovincialis* lineages. The colour of the branches corresponds to the most probable location of their descendant nodes. The main lineages were Mediterranean (red) and Atlantic (fuchsia). The same colour coding is presented in the pie charts at key nodes. The sequences used are presented in Tables 1 and S2.
